# Supplementary material
Source: publisher figshare collection journal article supplement (https://gsajournals.figshare.com/ndownloader/files/26897819)
Supplement: Supplementary file 1 [file 26897819]

**APPENDIX S2.** Calibration points used in this study.

| **Calibrated node** | **Fossil name** | **Organ** | **Country** | **Period/Epoch** | **Age**  **(Ma)** | **Reference** | **Comment** |
| --- | --- | --- | --- | --- | --- | --- | --- |
| Stem Malvaceae | *Bombacoxylon langstoni* Wheeler & Lehman | Wood | USA | Late Cretaceous (Campanian) | 84–74 | Wheeler and Lehman, 2000 | Assigned to stem Malvaceae by Hernández-Gutiérrez and Magallón, 2019 |
| Stem *Sterculia* (crown Sterculiodeae) | *Sterculia patagonica* Berry*; Sterculia washburnii* Berry | Leaves | Argentina | Late Cretaceous (Maastrichtian) | 72–66 | Berry, 1938; Dutra and Batten, 2000 | Assigned to stem Sterculioideae by Hernández-Gutiérrez and Magallón, 2019 |
| Stem Tilioideae | *Tilia* sp*.* | Pollen | Canada | Late Cretaceous (Maastrichtian) | 72–66 | Rouse et al., 1970 | Assigned to stem Tilioideae by Hernández-Gutiérrez and Magallón, 2019 |
| Stem Grewioideae | *Grewinum canalisum* (Bande & Srivastava) Srivastava & Guleria | Wood | India | Late Cretaceous-Early Paleocene | 67–64 | Wheeler et al., 2017 | This study |
| Stem Brownlowioideae | *Discoidites borneensis* Muller | Pollen | Malaysia | Paleocene | 66–56 | Muller, 1968 | Assigned to stem Brownlowioideae by Hernández-Gutiérrez and Magallón, 2019 |
| Crown Bombacoideae | *Bombacacidites annae* (Van der Hammen) Germeraad | Pollen | Colombia | Late Palaeocene | 62–56 | Van der Hammen, 1954; Carvalho et al., 2011 | Assigned to stem Bombacoideae by Hernández-Gutiérrez and Magallón, 2019 |
| Crown Eumalvoideae | *Malvaciphyllum macondicus* M. Carvalho | Leaves | Colombia | Late Palaeocene | 62–56 | Carvalho et al., 2011 | Assigned to stem Eumalvoideae by Hernández-Gutiérrez and Magallón, 2019 |
| Crown Byttnerioideae | *Guazuma santacruzensis* Woodcock, Meyer & Prado | Wood | Peru | Late middle Eocene | 39 | Woodcock et al., 2019 | This study |

**References**

Berry, E. W., 1938. Tertiary flora from the Rio Pichileufu, Argentina. Spec. Pap. Geol. Soc. Am. 12: 1-149.

Dutra, T. L., and D. J. Batten, 2000. Upper Cretaceous floras of King George Island, West Antarctica, and their palaeoenvironmental and phytogeographic implications. Cretac. Res. 21: 181-209.

Carvalho, M. R., F. A. Herrera, C. A. Jaramillo, S. L. Wing, and R. Callejas, 2011 Paleocene Malvaceae from northern South America and their biogeographical implications. Am. J. Bot. 98: 1337-1355.

Muller J., 1968. Palynology of the Pedawan and Plateau Sandstone Formations (Cretaceous-Eocene) in Sarawak, Malaysia. Micropaleontology 14: 1-37.

Rouse, G. E., W. S. Jr. Hopkins, and K. M. Piel, 1970. Palynology of some Late Cretaceous and Early Tertiary deposits in British Columbia and adjacent Alberta, pp 213-246 in Symposium on palynology of the Late Cretaceous and Early Tertiary, edited by R. M. Kosanke, and A. T. Cross, Geological Society of America.

Van der Hammen, T., 1954 . The development of Colombian flora throughout geologic periods: I, Maastrichtian to Lower Tertiary. Boln. Geol. (Bogotá) 2: 49-106.

Wheeler, E. A., and T. M. Lehman, 2000. Late Cretaceous woody dicots from the Aguja and Javelina Formations, Big Bend National Park, Texas, USA. IAWA Journal 21: 83-120.

Wheeler, E. A., R. Srivastava, S. R. Manchester, and P. Baas, 2017. Surprisingly modern latest Cretaceous–earliest Paleocene woods of India. IAWA Journal 38: 456-542.

Woodcock, D. W., H. W. Meyer, and Y. Prado, 2019. The Piedra Chamana fossil woods (Eocene, Peru), II. IAWA Journal 40: 551-595.
